# Supplementary material
Source: PubMed Central journal article supplement (PMC6352996)
Supplement: netn-02-381-s001.pdf [file netn-02-381-s001.pdf]

| <b>Region</b>                                                           | <b>X</b> | <b>Y</b> | <b>Z</b> |
|-------------------------------------------------------------------------|----------|----------|----------|
| <b><i>ATX<sub>Post-Pre</sub> &gt; Plc<sub>Post-Pre</sub> (Rest)</i></b> |          |          |          |
| Left Occipital (138)                                                    | -9       | -78      | -4       |
| Left Superior Frontal (157)                                             | -42      | 16       | 48       |
| Right Superior Frontal (200)                                            | 22       | 21       | 46       |
| Right Occipital (307)                                                   | 14       | -74      | -2       |
| Right Frontal Pole (317)                                                | 24       | 51       | 24       |
| Right Frontal Pole (320)                                                | 31       | 52       | 10       |
| Right Superior Frontal (327)                                            | 42       | 20       | 48       |
| Left Amygdala (339)                                                     | -22      | -10      | -12      |
| Right Amygdala (346)                                                    | 22       | -8       | -12      |
| <b><i>Pupil Diameter and Integration (Rest)</i></b>                     |          |          |          |
| Left Anterior Insula (80)                                               | -40      | 24       | -14      |
| Left Superior Temporal (127)                                            | -54      | -4       | -10      |
| Right Dorsal Anterior Cingulate (188)                                   | 4        | 22       | 28       |
| Right Superior Temporal (225)                                           | 60       | -24      | -6       |
| Right Anterior Insula (243)                                             | 28       | 18       | -20      |
| Right Dorsal Prefrontal (276)                                           | 40       | 18       | 28       |
| Right Temporal Pole (290)                                               | 60       | -10      | -14      |
| <b><i>Main Effect (N-back)</i></b>                                      |          |          |          |
| Left Dorsal Anterior Cingulate (28)                                     | -9       | 25       | 28       |
| Left Dorsal Anterior Cingulate (29)                                     | -10      | 34       | 22       |
| Left Medial Parietal (30)                                               | -11      | -48      | 60       |
| Left Premotor (41)                                                      | -27      | -7       | 46       |
| Left Motor (45)                                                         | -37      | -23      | 62       |
| Left Premotor (48)                                                      | -17      | -9       | 62       |
| Left Frontal Operculum (79)                                             | -47      | 39       | -9       |
| Left Temporal Pole (129)                                                | -45      | 9        | -37      |
| Left Superior Frontal (145)                                             | -16      | 49       | 37       |
| Left Temporal Pole (159)                                                | -51      | 7        | -20      |
| Right Dorsal Occipital (166)                                            | 22       | -85      | 24       |
| Right Dorsal Anterior Cingulate (183)                                   | 8        | 35       | 23       |
| Right Medial Sensory (193)                                              | 12       | -41      | 67       |
| Right Medial Motor (195)                                                | 7        | -8       | 51       |
| Right Motor (197)                                                       | 42       | -11      | 47       |
| Right Premotor (205)                                                    | 29       | -14      | 64       |
| Right Premotor (207)                                                    | 21       | -6       | 65       |
| Right Sensory (217)                                                     | 49       | -26      | 52       |
| Right Dorsal Occipital (255)                                            | 18       | -78      | 34       |
| Right Middle Frontal (272)                                              | 38       | 29       | 36       |
| Right Occipital (307)                                                   | 14       | -92      | 15       |
| Right Ventral Temporal (312)                                            | 20       | -11      | 25       |
| Right Ventral Temporal (314)                                            | 30       | -19      | -19      |
| Right Superior Frontal (316)                                            | 21       | 43       | 35       |
| Right Middle Frontal (328)                                              | 39       | 10       | 43       |
| Left Thalamus (334)                                                     | -8       | -18      | 2        |
| Right Thalamus (341)                                                    | 8        | -18      | 2        |
| Left Crus II (358)                                                      | -24      | -78      | -40      |
| Right Crus II (360)                                                     | 24       | -78      | -40      |
| <b><i>Load Effect (N-back)</i></b>                                      |          |          |          |
| Left Anterior Insula (85)                                               | -44      | 33       | -7       |
| Left Dorsolateral Prefrontal (108)                                      | -43      | 19       | 34       |
| Right Parietal Operculum (167)                                          | 48       | -43      | 42       |
| Right Anterior Insula (249)                                             | 34       | 24       | 10       |
| Right Frontal Pole (319)                                                | 24       | 59       | 5        |

**Table S1** – MNI Co-ordinates for parcels associated with significantly increased integration ( $B_T$ ) in each of the analyses presented in the manuscript (parcel number in parentheses).

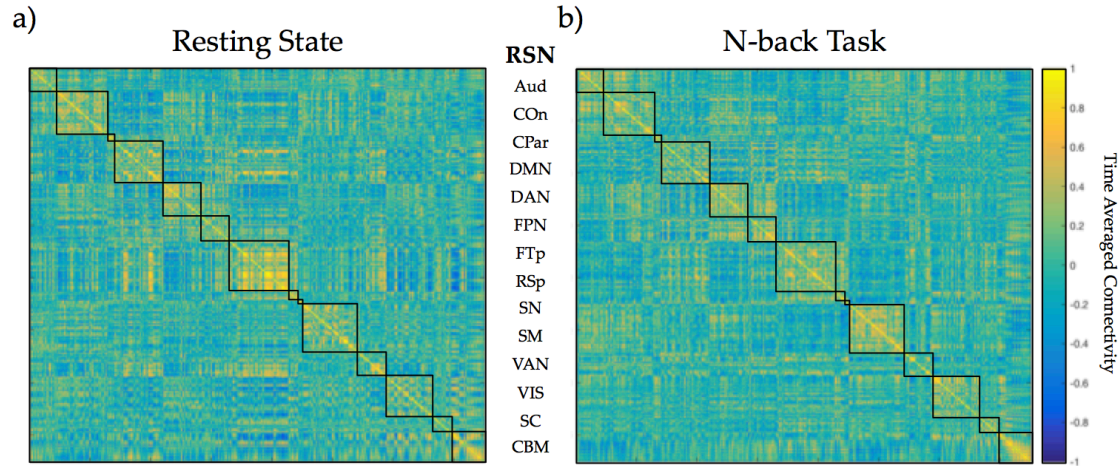

**Figure S1** – Time-averaged connectivity matrix for resting state (a) and task (b), ordered by resting state network (RSN). Key: Aud – auditory; COn – cingulo-opercular; CPar – cingulo-parietal; DMN – default mode; DAN – dorsal attention; FPN – frontoparietal; FTp – frontotemporal; RSp – Retrosplenial; SN – salience; SM – somatomotor; VAN – ventral attention; VIS – visual; SC – subcortical; CBM – cerebellum.

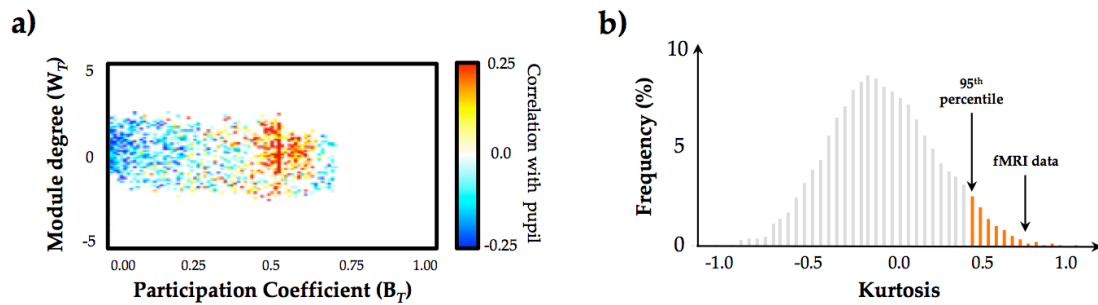

**Figure S2** – a) cartographic profile demonstrating the group mean Pearson’s correlation between pupil diameter and network-level integration across all four conditions; and b) a histogram showing results of a permutation analysis. The results demonstrate that the data used in our experiment displayed higher kurtosis (indicative of non-stationarity) than the results of 5000 iterations of a stationary vector autoregressive null model that was applied to the same methodological pipeline as the fMRI data from our experiment.
